# Supplementary material for: Insights into the karyotype and genome evolution of haplogyne spiders indicate a polyploid origin of lineage with holokinetic chromosomes
Source: PubMed Central journal article supplement (PMC6395618; doi:10.1038/s41598-019-39034-3), 2019-02-28
Supplement: 41598_2019_39034_MOESM1_ESM.pdf [file 41598_2019_39034_MOESM1_ESM.pdf]

## Supplementary Figures and Tables

Insights into the karyotype and genome evolution of haplogyne spiders indicate a polyploid origin of lineage with holokinetic chromosomes

Jiří Král<sup>1\*</sup>, Martin Forman<sup>1</sup>, Tereza Kořínková<sup>1</sup>, Azucena C. Reyes Lerma<sup>1</sup>, Charles R. Haddad<sup>2</sup>, Jana Musilová<sup>1,3</sup>, Milan Řezáč<sup>3</sup>, Ivalú M. Ávila Herrera<sup>1</sup>, Shefali Thakur<sup>1</sup>, Ansie S. Dippenaar-Schoeman<sup>4</sup>, František Marec<sup>5</sup>, Lucie Horová<sup>6</sup>, Petr Bureš<sup>6</sup>

<sup>1</sup>Department of Genetics and Microbiology, Faculty of Science, Charles University, Viničná 5, 128 44 Prague 2, Czech Republic

<sup>2</sup>Department of Zoology and Entomology, University of the Free State, P.O. Box 339, Bloemfontein 9300, South Africa

<sup>3</sup>Crop Research Institute, Drnovská 73, 161 06 Prague 6 - Ruzyně, Czech Republic

<sup>4</sup>Department of Zoology and Centre for Invasion Biology, University of Venda, Thohoyandou, 0950, South Africa

<sup>5</sup>Biology Centre of the Czech Academy of Sciences, Institute of Entomology, Branišovská 31, 370 05 České Budějovice, Czech Republic

<sup>6</sup>Department of Botany and Zoology, Faculty of Science, Masaryk University, Kotlářská 2, 611 37 Brno, Czech Republic

**Supplementary Figure 1.** Phylogeny of spiders and related arachnid orders. A compilation of hypotheses from two published studies<sup>19,56</sup>.

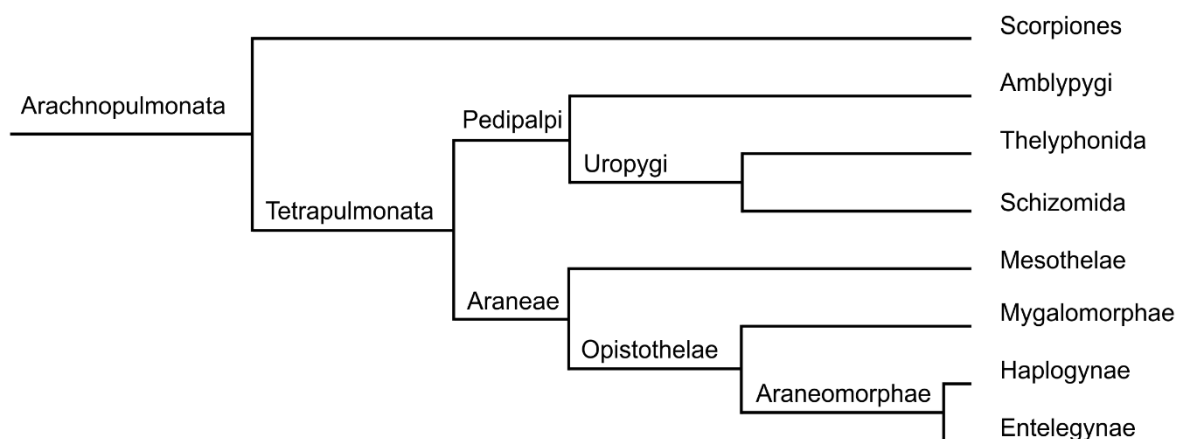

**Supplementary Figure 2.** Mitosis and meiosis in holokinetic haplogyne spiders of the families Oonopidae and Dysderidae. Preparations were stained with Giemsa except **b** and **c** stained with DAPI. Unless otherwise specified, based on male preparations. Abbreviations and symbols: \* (bivalent with two chiasmata), N (interkinesis nucleus), X (X chromosome). **(a)** *Oonops ebenecus*, Oonopidae ( $2n = 7, X0$ ), diplotene consisting of three bivalents and an X chromosome, which is positively heteropycnotic; **(b, c)** *O. pulcher*. **(b)** Mitotic metaphase ( $2n = 7, X0$ ), X chromosome is slightly longer than the other chromosomes; **(c)** Diplotene, note three bivalents and the positively heteropycnotic X chromosome; **(d)** *Ischnothyreus* sp., Oonopidae, late metaphase I ( $2n = 7, X0$ ) after disintegration of chiasmata, consisting of three bivalents and a positively heteropycnotic X chromosome; **(e, f)** *Kaemis* sp., Dysderidae (Rhodinae). **(e)** Diakinesis ( $2n = 7, X0$ ) consisting of three bivalents and an X chromosome exhibiting a low condensation; **(f)** two sister metaphases II,  $n = 4$  (left) and  $n = 3$  (right), separated by a dashed line. The X chromosome differs from the other chromosomes by tighter attachment of the chromatids and slightly positive heteropycnosis; **(g)** *Dasumia crassitibialis*, Dysderidae (Harpacteinae), spermatogonial metaphase ( $2n = 7, X0$ ). The X chromosome exhibits a slightly precocious separation of the chromatids; **(h)** *Harpactea hentschi*, Dysderidae (Harpacteinae), female, oogonial metaphase ( $2n = 8$ ); **(i)** *H. hombergi*, metaphase I ( $2n = 7, X0$ ). Note three bivalents and an X chromosome univalent; **(j)** *H. lepida*, metaphase I ( $2n = 25, X0$ ) consisting of 12 bivalents and a large X chromosome, which is positively heteropycnotic; **(k)** *H. rubicunda*, metaphase II plate ( $n = 4$ ) and adjacent interkinesis nucleus containing a positively heteropycnotic X chromosome on the periphery. The X chromosome of the metaphase II plate is formed by a single chromatid only as a result of inverted meiosis of the sex chromosome; **(l)** *Dysderocrates* sp.n., Dysderidae (Dysderinae), spermatogonial metaphase ( $2n = 9, X0$ ); the sex chromosome is considerably longer than the other chromosomes.

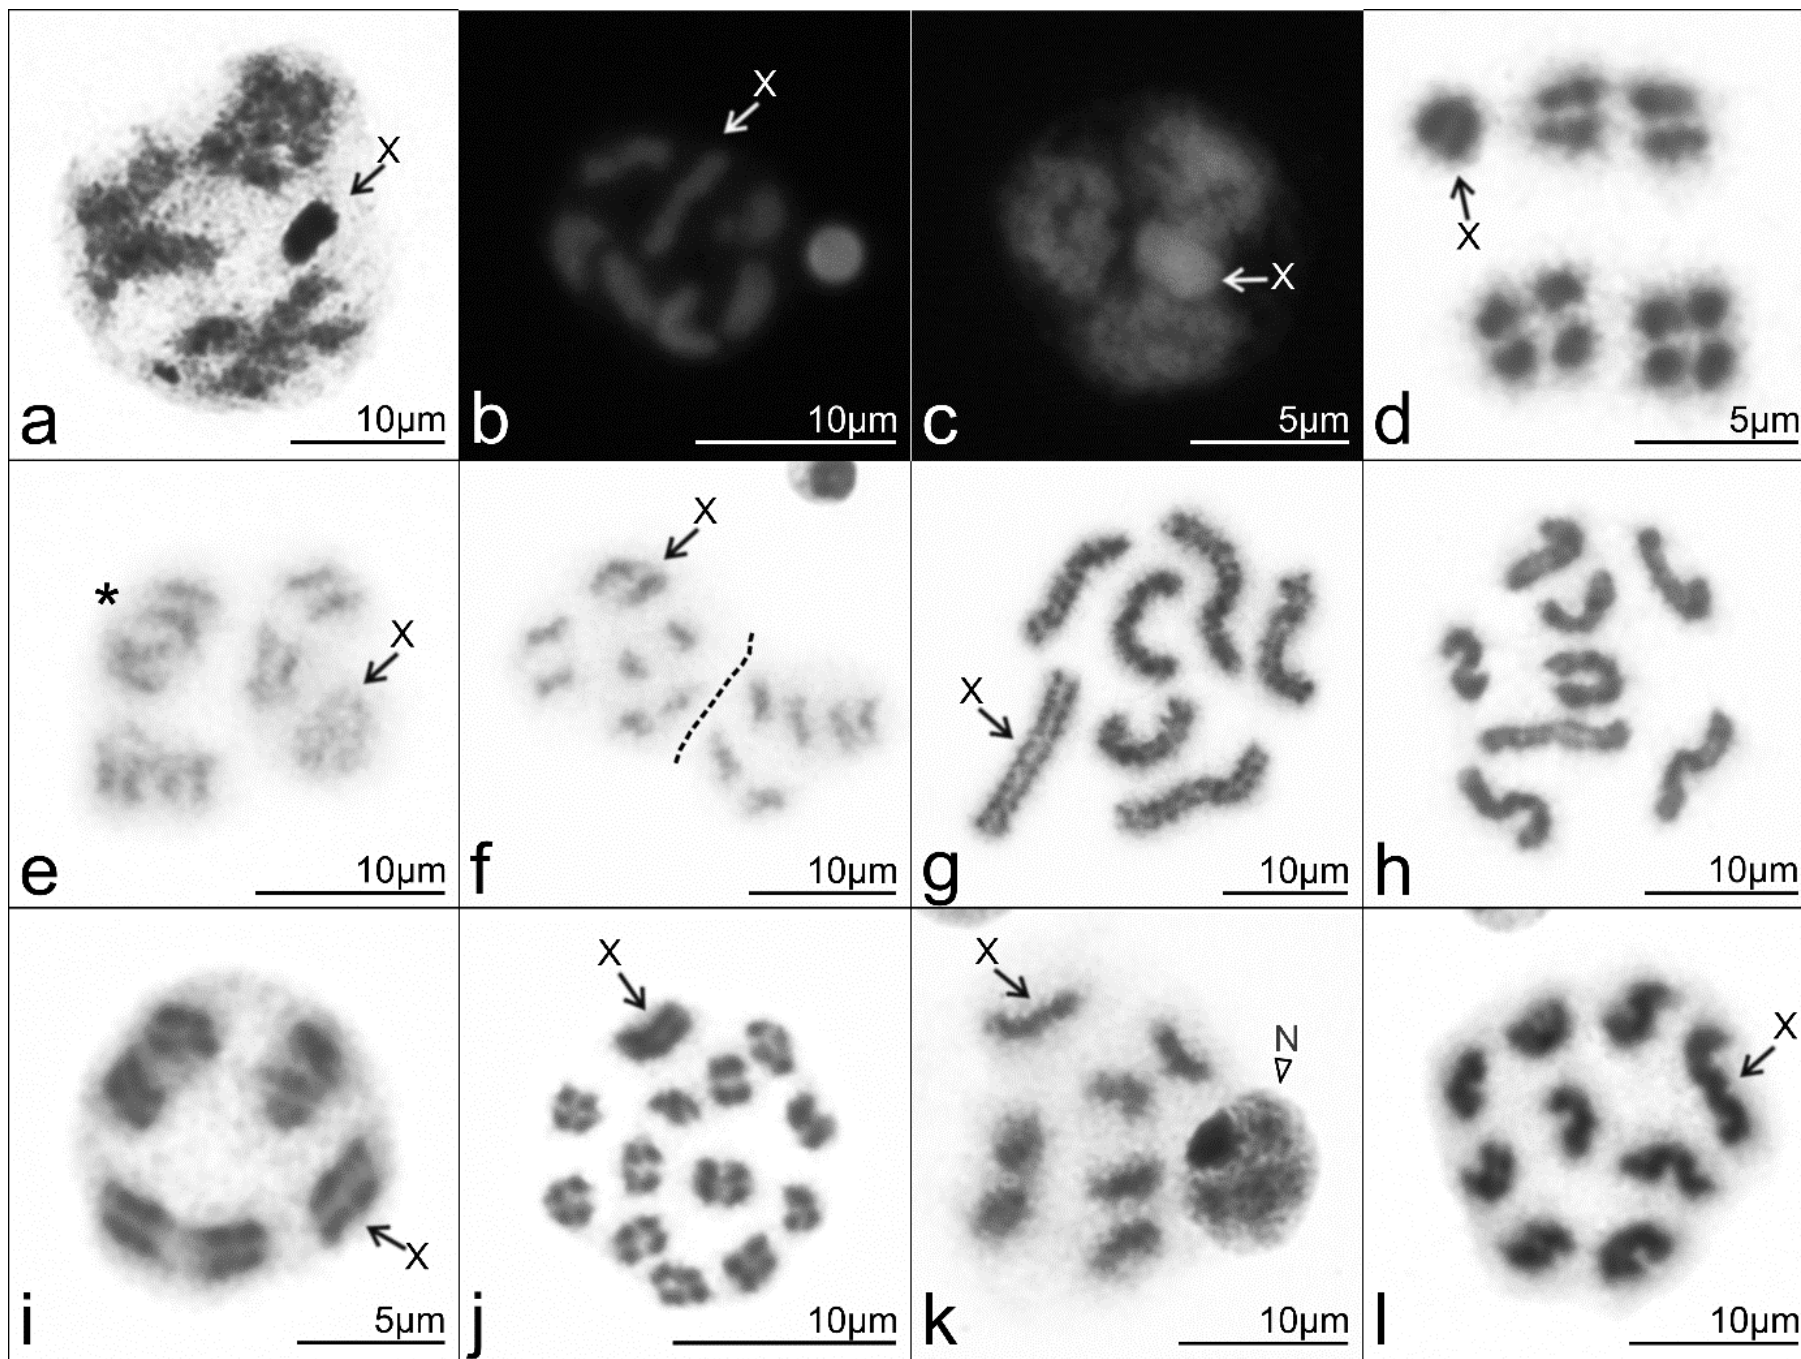

**Supplementary Figure 3.** Mitotic chromosomes of Caponiidae (Nopininae), females. Red dotted lines indicate chromosome contacts, green dotted lines overlapping of chromosomes. (a) *Nopsides ceralbonus*, oogonial mitosis ( $2n = 64$ ). Below the same mitosis with indicated chromosome contacts and overlaps; (b) *Nops* sp., oogonial mitosis ( $2n = 60-62$ ). Below the same mitosis with indicated chromosome contacts and overlaps.

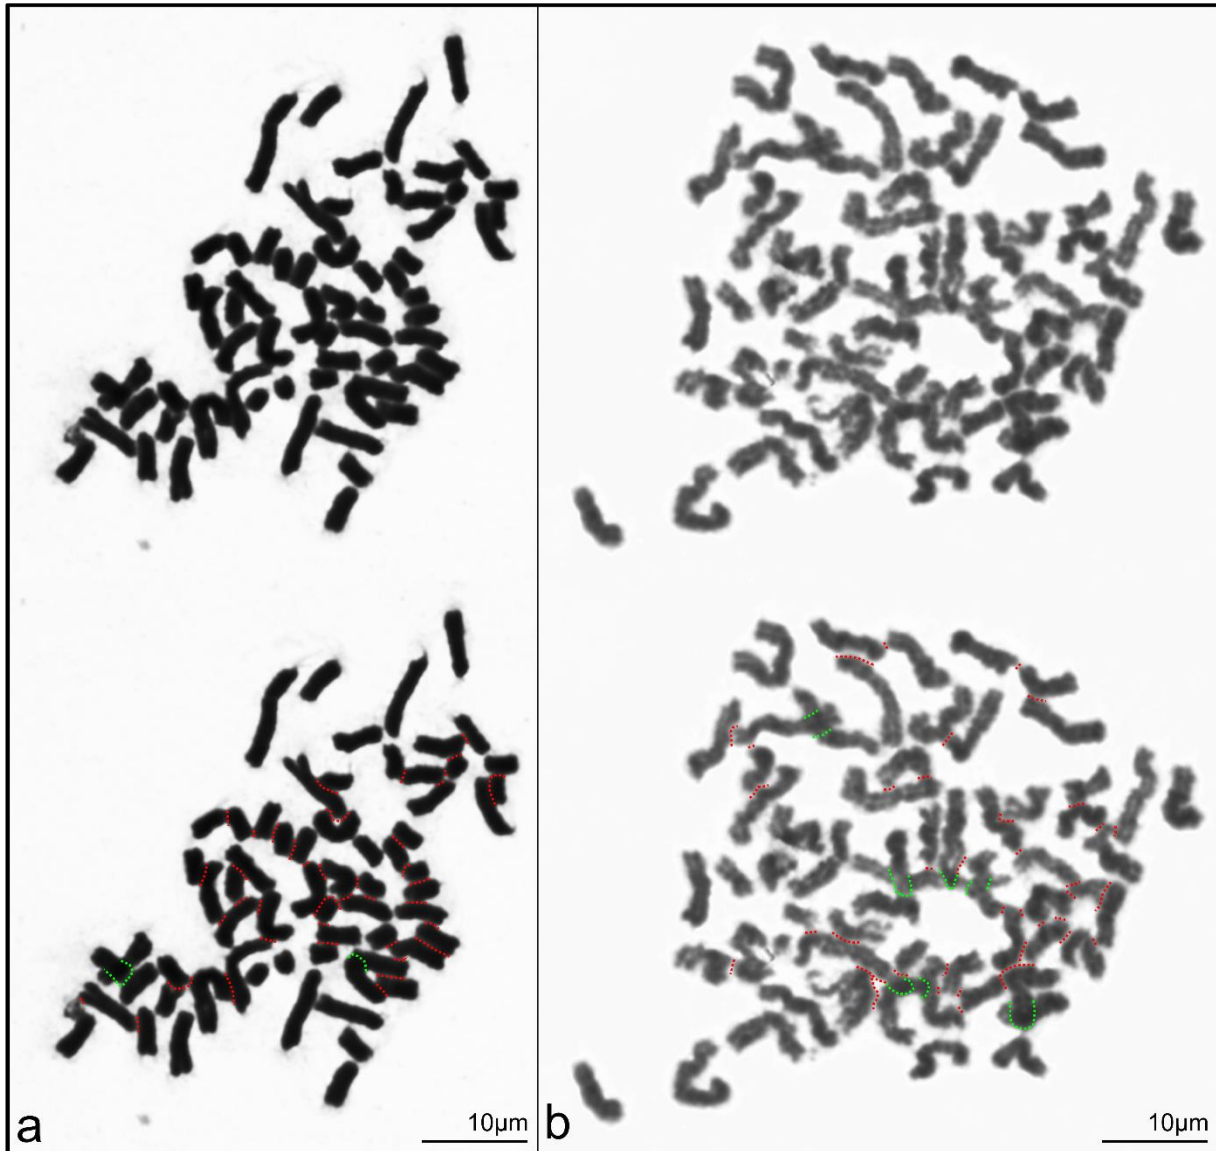

**Supplementary Figure 4.** Female karyotype of *Caponia capensis* (Caponiidae), based on mitotic metaphase ( $2n = 136$ ). The karyotype consists of 14 metacentric (nos 1-3, 5, 8-10, 13, 24, 45, 53, 55, 63, 68), 12 submetacentric (nos 4, 7, 12, 17, 18, 20, 21, 23, 28, 31, 46, 60), 16 subtelocentric (nos. 6, 11, 14-16, 19, 22, 25, 27, 30, 35-37, 41, 47, 51), and 26 acrocentric pairs (nos. 26, 29, 32-34, 38-40, 42-44, 48-50, 52, 54, 56-59, 61, 62, 64-67). The karyotype of this specimen also contains two tiny uneven chromosome fragments (F).

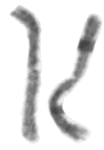

1

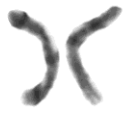

2

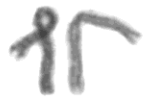

3

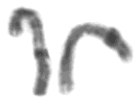

4

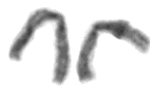

5

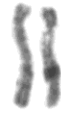

6

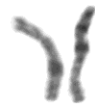

7

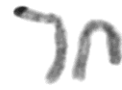

8

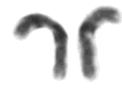

9

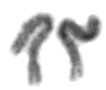

10

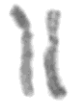

11

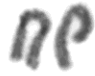

12

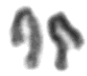

13

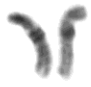

14

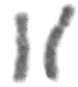

15

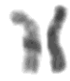

16

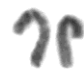

17

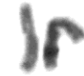

18

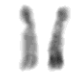

19

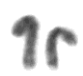

20

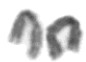

21

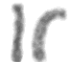

22

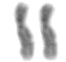

23

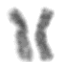

24

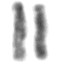

25

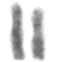

26

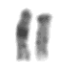

27

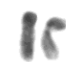

28

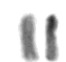

29

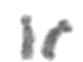

30

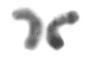

31

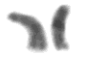

32

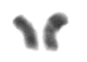

33

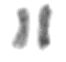

34

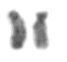

35

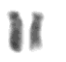

36

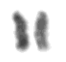

37

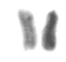

38

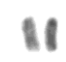

39

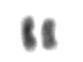

40

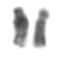

41

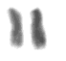

42

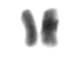

43

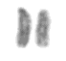

44

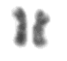

45

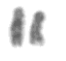

46

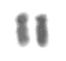

47

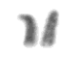

48

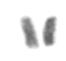

49

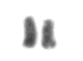

50

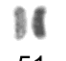

51

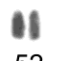

52

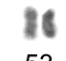

53

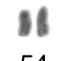

54

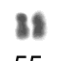

55

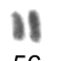

56

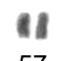

57

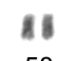

58

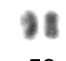

59

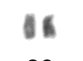

60

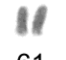

61

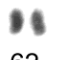

62

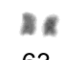

63

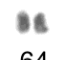

64

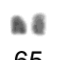

65

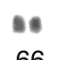

66

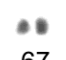

67

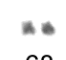

68

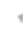

F

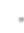

F

10µm

**Supplementary Figure 5.** Chromosomes of monocentric haplogyne spiders used for the analysis of genome size. Unless otherwise specified, based on male preparations. Abbreviations: P (precocious separation of homologous chromosomes of a bivalent), S (sex chromosome trivalent), X (sex chromosome X), Y (sex chromosome Y), S (sex chromosome trivalent). **(a)** *Sahastata nigra*, Filistatidae, female, oogonial metaphase ( $2n = 28$ ); **(b)** *Andorahano ansieae*, Filistatidae ( $2n = 25, X_1X_2Y$ ), spermatogonial metaphase containing a tiny Y chromosome. Inset: sex chromosome trivalent in metaphase I. Two large X chromosomes pair achiasmatically by their ends with a Y microchromosome (see schematic drawing); **(c, d)** *Paculla* sp., Pacullidae ( $2n = 33, X_1X_2Y$ ). **(c)** Spermatogonial metaphase without any microchromosome, which implies a relatively large size of the Y chromosome; **(d)** Metaphase I comprising 15 bivalents and a sex chromosome trivalent formed by two X chromosomes and a Y chromosome. In contrast to the previous species, the sex chromosome trivalent is highly condensed. Schematic drawing shows supposed pairing of sex chromosomes in the trivalent; **(e)** *Scytodes* sp. 1, spermatogonial metaphase ( $2n = 19, X_0$ ) containing a large metacentric X chromosome.

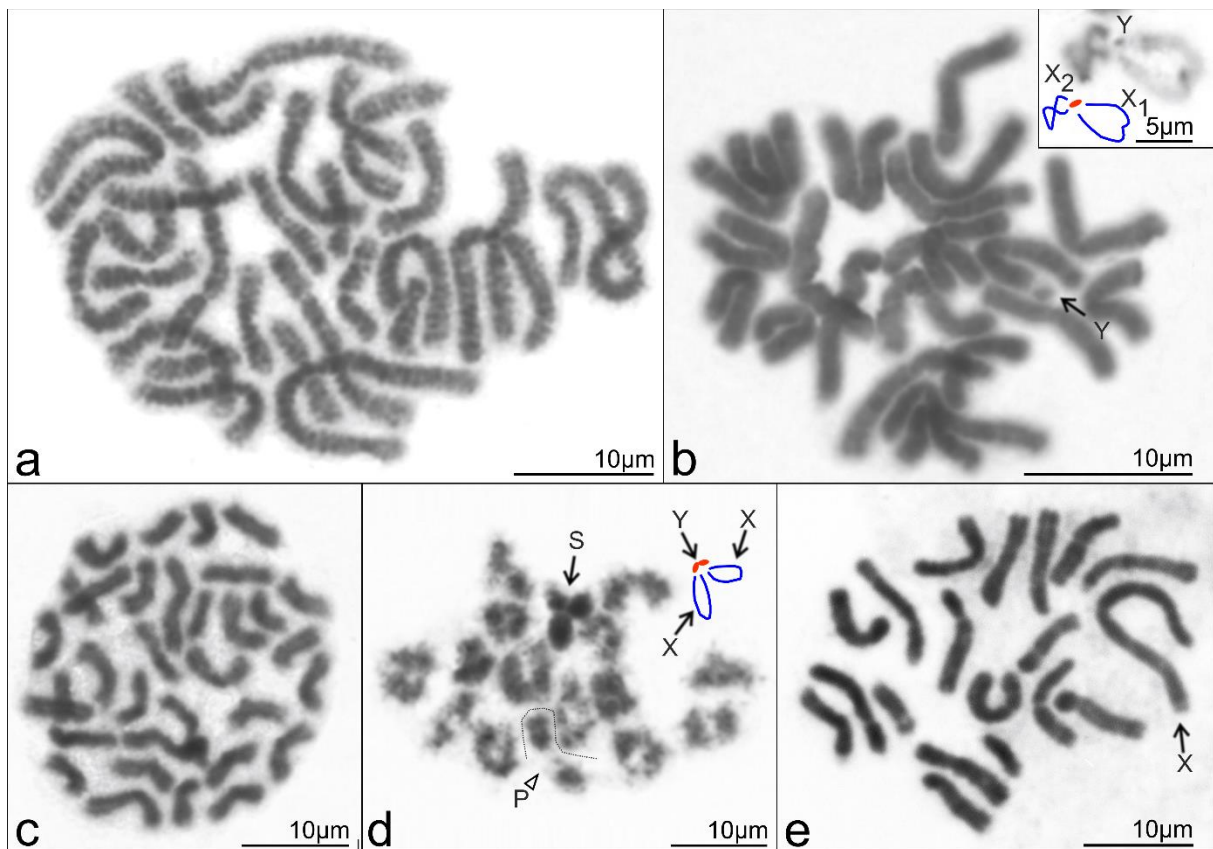

**Supplementary Table 1.** Collection data of specimens used.

| <b>Taxon</b>                             | <b>Locality</b>                                                                                 | <b>GPS</b>                |
|------------------------------------------|-------------------------------------------------------------------------------------------------|---------------------------|
| <b>Taxa with holokinetic chromosomes</b> |                                                                                                 |                           |
| <b>Dysderidae (Dysderinae)</b>           |                                                                                                 |                           |
| <i>Dysdera erythrina</i>                 | Břežanské údolí valley, Prague-Zbraslav, Czech Republic                                         | 49°58'06.3"N 14°24'17.0"E |
| <i>Dysderocrates storkani</i>            | Ivine Vodice, Velebit Mts., Croatia                                                             | 44°20'11.6"N 15°32'11.8"E |
| <i>Dysderocrates</i> sp.                 | forest along the road from Pentalofos to Eptachori, Macedonia, Greece                           | 40°12'42.4"N 21°03'48.3"E |
| <i>Harpactocrates</i> sp.                | breeding (Spain)                                                                                | -                         |
| <b>Dysderidae (Harpacteinae)</b>         |                                                                                                 |                           |
| <i>Dasumia crassitibialis</i>            | Nahal Kziv valley, Upper Galilee, Israel                                                        | 33°02'29.4"N 35°10'54.4"E |
| <i>Harpactea cecconii</i>                | Agios Georgios near Akamas peninsula, Cyprus                                                    | 34°54'29.5"N 32°19'59.5"E |
| <i>H. hentschi</i>                       | gorge along the road from Olympiada to Kryovrysi, Olympos Mts., Thessaly, Greece                | 39°59'32.6"N 22°17'11.7"E |
| <i>H. hombergi</i>                       | Břežanské údolí valley, Prague-Zbraslav, Czech Republic                                         | 49°58'06.3"N 14°24'17.0"E |
| <i>H. lepida</i>                         | Kamenné, Trojačka Mt., Beskydy Mts., Czech Republic                                             | 49°30'20.5"N 18°00'20.2"E |
| <i>H. rubicunda</i>                      | Břežanské údolí valley, Prague-Zbraslav, Czech Republic                                         | 49°58'06.3"N 14°24'17.0"E |
| <b>Dysderidae (Rhodinae)</b>             |                                                                                                 |                           |
| <i>Kaemis</i> sp.                        | Camping Can Cervera near Montseny town, Montseny Mts., Spain                                    | 41°46'12.5"N 2°24'15.1"E  |
| <b>Oonopidae</b>                         |                                                                                                 |                           |
| <i>Gamasomorpha lutzi</i>                | Luquillo, Puerto Rico, USA                                                                      | 18°19'23.0"N 65°44'18.7"W |
| <i>Ischnothyreus</i> sp.                 | Luquillo, Puerto Rico, USA                                                                      | 18°19'23.0"N 65°44'18.7"W |
| <i>Oonops ebenecus</i>                   | Luquillo, Puerto Rico, USA                                                                      | 18°19'23.0"N 65°44'18.7"W |
| <i>O. pulcher</i>                        | Antwerpen, Belgium                                                                              | 51°11'59.9"N 4°28'05.1"E  |
|                                          | Turnhout, Belgium                                                                               | 51°19'02.6"N 4°56'54.6"E  |
| <b>Orsolobidae</b>                       |                                                                                                 |                           |
| <i>Afrilobus</i> sp.                     | <i>Eucalyptus</i> , 15 km ENE of Louwsberg on R69 road, KwaZulu-Natal, Republic of South Africa | 31°08'01.0"S 25°38'06.0"E |
| <i>Azanielobus</i> sp.                   | Hogsback, Eastern Cape, Republic of South Africa                                                | 32°36'12.9"S 26°56'20.3"E |
| <b>Segestriidae</b>                      |                                                                                                 |                           |
| <i>Ariadna</i> sp.                       | near Okahandja (on B1 road), Namibia                                                            | 22°05'38.6"S 16°57'10.0"E |

|                           |                                                                                                                           |                           |
|---------------------------|---------------------------------------------------------------------------------------------------------------------------|---------------------------|
| <i>Segestria bavarica</i> | cliffs, Šárka valley, Prague, Czech Republic                                                                              | 50°05'43.2"N 14°19'15.1"E |
| <i>S. senoculata</i>      | road from Hodslavice to Valašské Meziříčí<br>(forest between the road and Hostašovice railway<br>station), Czech Republic | 49°31'14.8"N 18°00'51.0"E |

#### Taxa with monokinetic chromosomes

##### **Caponiidae (Caponiinae)**

|                         |                                                                                |                           |
|-------------------------|--------------------------------------------------------------------------------|---------------------------|
| <i>Caponia capensis</i> | Benfontein Nature Reserve, Free State, Republic<br>of South Africa             | 28°49'11.6"S 24°50'10.6"E |
|                         | De Hoop Nature Reserve, Western Cape,<br>Republic of South Africa              | 34°27'12.2"S 20°24'15.7"E |
| <i>C. hastifera</i>     | Erfenis Dam Nature Reserve, Free State,<br>Republic of South Africa            | 28°30'27.8"S 26°48'24.3"E |
|                         | Hopefield farm, Bloemfontein district, Free<br>State, Republic of South Africa | 28°51'47.5"S 26°09'45.0"E |
| <i>C. natalensis</i>    | Ndumo Game Reserve, KwaZulu-Natal,<br>Republic of South Africa                 | 26°54'23.9"S 32°19'11.1"E |

##### **Caponiidae (Nopinae)**

|                                    |                                                                                                                                                            |                            |
|------------------------------------|------------------------------------------------------------------------------------------------------------------------------------------------------------|----------------------------|
| <i>Nops</i> aff. <i>variabilis</i> | Neiva, Colombia                                                                                                                                            | 2°55'05.8"N 75°17'45.0"W   |
| <i>Nops</i> sp.                    | coffee-banana plantation with montane rainforest<br>remains, Villa Las Neblinas, Constanza,<br>Cordillera Central, La Vega Province,<br>Dominican Republic | 19°00'22.7"N 70°32'18.6"W  |
| <i>Nopsides ceralbonus</i>         | San Dionisio canyon, Sierra de la Laguna Mts.,<br>Baja California Sur State, Mexico                                                                        | 23°32'56.5"N 109°49'49.7"W |
| <i>Tarsonops</i> sp.               | along river, La Purísima, Baja California Sur<br>State, Mexico                                                                                             | 26°11'16.7"N 112°06'23.4"W |

##### **Diguetidae**

|                             |                                                       |  |
|-----------------------------|-------------------------------------------------------|--|
| <i>Diguetia albolineata</i> | breeding stock, Spiderpharm Ltd., Yarnell, AZ,<br>USA |  |
|-----------------------------|-------------------------------------------------------|--|

##### **Filistatidae (Filistatinae)**

|                                          |                                                |                            |
|------------------------------------------|------------------------------------------------|----------------------------|
| <i>Filistata insidiatrix</i>             | acropolis of Rhodes town, Rhodes, Greece       | 36°26'23.0"N 28°12'41.0"E  |
| <i>Kukulcania</i> aff. <i>hibernalis</i> | La Purísima, Baja California Sur State, Mexico | 26°11'16.7"N 112°06'23.4"W |
| <i>Sahastata nigra</i>                   | Jahel, Arava valley, Israel                    | 30°04'53.3"N 35°07'55.6"E  |

##### **Filistatidae (Prithinae)**

|                           |                                                          |                           |
|---------------------------|----------------------------------------------------------|---------------------------|
| <i>Andoharano ansieae</i> | Sachsenheim Guest Farm, westward from<br>Etosha, Namibia | 18°44'53.5"S 17°15'22.9"E |
|---------------------------|----------------------------------------------------------|---------------------------|

##### **Pacullidae**

|                    |                                                                         |                           |
|--------------------|-------------------------------------------------------------------------|---------------------------|
| <i>Paculla</i> sp. | Kuala Belalong Field Studies Centre, Temburong<br>National Park, Brunei | 4°32'38.9"N 115°09'40.5"E |
|--------------------|-------------------------------------------------------------------------|---------------------------|

##### **Pholcidae**

|                             |                        |                           |
|-----------------------------|------------------------|---------------------------|
| <i>Pholcus phalangoides</i> | Prague, Czech Republic | 50°04'17.8"N 14°25'26.2"E |
|-----------------------------|------------------------|---------------------------|



**Scytodidae**

*Scytodes* sp. 1 Adullam Nature Reserve, Nehusha, Israel 31°37'49.6"N 34°57'03.0"E

*Scytodes* sp. 2 Essaouira, Morocco 31°31'42.1"N 9°44'28.9"W

**Sicariidae**

*Hexophthalma* sp. approx. 20 km NE from Hentiesbaai (on B2 road), Namibia 21°56'14.5"S 14°24'28.7"E

*Loxosceles rufescens* Midreshet Ben-Gurion, Israel 30°50'59.3"N 34°47'11.7"E



**Supplementary Table 3.** Summary of karyotype and genome data used for the preparation of Figure 4. Abbreviations: structure - chromosome structure (H - holokinetic; M - monocentric), 2C - DNA content of diploid chromosome complements in Mbp, 2C/2n - average chromosome size (i.e., genome size/chromosome number, Mbp/chromatid), GC - GC proportion (%).

| Species                           | Morphology | Clade                               | Clade number | 2n   | 2C      | GC     | 2C/2n   |
|-----------------------------------|------------|-------------------------------------|--------------|------|---------|--------|---------|
| <i>Filistata insidiatrix</i>      | M          | Filistatidae                        | 1            | 34♀  | 8521.09 | 36.342 | 250.62  |
| <i>Kukulcania aff. hibernalis</i> | M          | Filistatidae                        | 1            | 26♀  | 10259.4 | 32.257 | 394.591 |
| <i>Sahastata nigra</i>            | M          | Filistatidae                        | 1            | 28♀  | 11849.2 | 33.679 | 423.186 |
| <i>Andorahano ansieae</i>         | M          | Filistatidae                        | 1            | 24♀  | 5111.78 | 35.899 | 212.991 |
| <i>Hexopthalma sp.</i>            | M          | Scytodidae + Sicariidae             | 2            | 20♀  | 2587.14 | 36.096 | 129.357 |
| <i>Loxosceles rufescens</i>       | M          | Scytodidae + Sicariidae             | 2            | 22♀  | 10182.8 | 39.807 | 462.854 |
| <i>Scytodes sp. 1</i>             | M          | Scytodidae + Sicariidae             | 2            | 20♀  | 4551.01 | 42.579 | 227.55  |
| <i>Scytodes sp. 2</i>             | M          | Scytodidae + Sicariidae             | 2            |      | 3057.96 | 39.826 |         |
| <i>Diguetia albolineata</i>       | M          | Diguetidae + Pacullidae + Pholcidae | 3            | 20♀  | 2954.35 | 43.542 | 147.717 |
| <i>Paculla sp.</i>                | M          | Diguetidae + Pacullidae + Pholcidae | 3            | 34♀  | 7658.65 | 40.583 | 225.255 |
| <i>Pholcus phalangioides</i>      | M          | Diguetidae + Pacullidae + Pholcidae | 3            | 26♀  | 1754.41 | 34.555 | 67.4774 |
| <i>Caponia natalensis</i>         | M          | Caponiidae                          | 4            | 158♀ |         |        |         |
| <i>Caponia capensis</i>           | M          | Caponiidae                          | 4            | 136♀ | 38927.5 |        | 286.232 |
| <i>Caponia hastifera</i>          | M          | Caponiidae                          | 4            | 136♀ | 47428.6 | 43.183 | 348.739 |
| <i>Nops aff. variabilis</i>       | M          | Caponiidae                          | 4            | 55♂  | 31121.4 | 42.246 | 565.844 |
| <i>Nops sp.</i>                   | M          | Caponiidae                          | 4            | 62♀  | 32830   | 43.525 | 529.517 |
| <i>Nopsides ceralbonus</i>        | M          | Caponiidae                          | 4            | 64♀  |         |        |         |
| <i>Tarsonops sp.</i>              | M          | Caponiidae                          | 4            | 60♀  |         |        |         |
| <i>Ariadna sp.</i>                | H          | Segestriidae                        | 5            | 8♀   | 16890.7 | 39.351 | 2111.33 |
| <i>Segestria bavarica</i>         | H          | Segestriidae                        | 5            | 16♀  | 6251.37 | 38.488 | 390.711 |
| <i>Segestria senoculata</i>       | H          | Segestriidae                        | 5            | 16♀  | 8043.74 | 38.94  | 502.734 |
| <i>Gamasomorpha lutzi</i>         | H          | Oonopidae                           | 6            | 8♀   |         |        |         |
| <i>Ischnothyreus sp.</i>          | H          | Oonopidae                           | 6            | 8♀   |         |        |         |
| <i>Oonops ebenecus</i>            | H          | Oonopidae                           | 6            | 8♀   |         |        |         |
| <i>Oonops pulcher</i>             | H          | Oonopidae                           | 6            | 8♀   | 6920.37 | 36.693 | 865.046 |
| <i>Afrilobus sp.</i>              | H          | Orsolobidae                         | 7            | 6♀   |         |        |         |

| <b>Species</b>                | <b>Morphology</b> | <b>Clade</b> | <b>Clade number</b> | <b>2n</b> | <b>2C</b> | <b>GC</b> | <b>2C/2n</b> |
|-------------------------------|-------------------|--------------|---------------------|-----------|-----------|-----------|--------------|
| <i>Azania lobus</i> sp.       | H                 | Orsolobidae  | 7                   |           | 3581.92   |           |              |
| <i>Dasunia crassitibialis</i> | H                 | Harpacteinae | 8                   | 8♀        | 5824.28   | 37.088    | 728.036      |
| <i>Harpactea ceconii</i>      | H                 | Harpacteinae | 8                   | 8♀        |           |           |              |
| <i>Harpactea hentschi</i>     | H                 | Harpacteinae | 8                   | 8♀        | 9567      | 39.335    | 1195.87      |
| <i>Harpactea hombergi</i>     | H                 | Harpacteinae | 8                   | 8♀        |           |           |              |
| <i>Harpactea lepida</i>       | H                 | Harpacteinae | 8                   | 26♀       | 8223.23   | 39.106    | 316.278      |
| <i>Harpactea rubicunda</i>    | H                 | Harpacteinae | 8                   | 8♀        | 6243.5    | 39.369    | 780.438      |
| <i>Dysdera erythrina</i>      | H                 | Dysderinae   | 9                   | 20♀       | 7644.37   | 39.25     | 382.218      |
| <i>Dysderocrates storkani</i> | H                 | Dysderinae   | 9                   | 22♀       |           |           |              |
| <i>Dysderocrates</i> sp.      | H                 | Dysderinae   | 9                   | 10♀       | 3137.16   | 36.458    | 313.716      |
| <i>Harpactocrates</i> sp.     | H                 | Dysderinae   | 9                   | 10♀       |           |           |              |
